# Supplementary material
Source: PubMed Central journal article supplement (PMC3393415)
Supplement: supp_56.7.3657_FigS1.pdf [file supp_56.7.3657_FigS1.pdf]

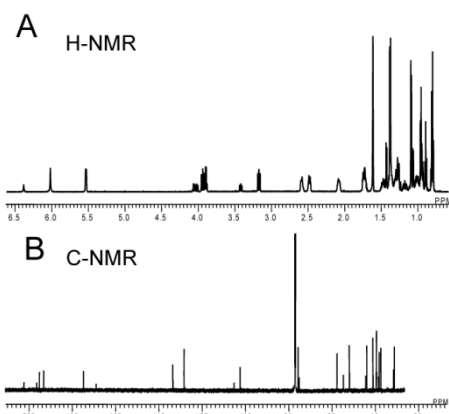

FIG. S1. <sup>1</sup>H (a) and <sup>13</sup>C NMR (b) spectra of signermycin B. <sup>1</sup>H NMR (600 MHz, CDCl<sub>3</sub>)(Fig. S1a): δ 5.93 (brs, 1H, H1'), 5.55 (brd,  $J=5.9$ , 1H, H9), 3.94 (dd,  $J=10.4$ , 11.6, 1H, H2), 3.90 (q, 7.0, 1H, H5'), 3.17 (dd,  $J=9.5$ , 10.7, 1H, H5), 2.59 (m, 1H, H11), 2.48 (m, 1H, H3), 2.08 (m, 1H, H8), 1.60 (s, 3H, H18), 1.38 (d,  $J=7.0$ , H6'), 1.36 (m, 2H, H4, 6), 1.24, 1.74 (m, m, 2H, H7), 1.17 1.47 (m, m, 2H, H12), 1.09 (d,  $J=6.3$ , 3H, H17), 1.00 1.30 (m, m, 2H, H13), 0.95 (t,  $J=7.2$ , 1H, H16), 0.94 1.72 (m, m, 2H, H15), 0.79 (t,  $J=7.3$ , 3H, H14); <sup>13</sup>C NMR (150 MHz, CDCl<sub>3</sub>)(Fig. S1b): δ 195.2 (s, C4'), 193.3 (s, C1), 174.9 (s, C2'), 133.6 (s, C10), 128.4 (d, C9), 102.5 (s, C3'), 75.7 (d, C5), 57.7 (d, C5'), 52.0 (d, C4), 43.9 (d, C11), 41.1 (d, C6), 39.5 (d, C3), 39.5 (d, C8), 38.2 (d, C2), 37.5 (t, C7), 31.2 (t, C12), 21.5 (t, C15), 20.9 (q, C18), 18.7 (q, C17), 17.7 (q, C6'), 17.0 (t, C13), 14.7 (q, C14), 13.5 (q, C16); Chemical shifts are reported as δ values relative to tetramethylsilane (TMS, 0.00 ppm). Data are reported as follows: chemical shift, multiplicity (s = singlet, d = doublet, t = triplet, q = quartet, m = multiplet, dd = doublet of doublets, br = broad), coupling constant, and integration.
