# Supplementary material
Source: PubMed Central journal article supplement (PMC3393415)
Supplement: supp_56.7.3657_TableS1.pdf [file supp_56.7.3657_TableS1.pdf]

Supplemental Table

Table S1. PCR primers used in this study.

| Primers              | Sequence (5'-3')               |
|----------------------|--------------------------------|
| <b>pET EfWalK</b>    |                                |
| WalKc(E.fa)-F        | ctgattgctagctcaatcacgaagcc     |
| WalKc(E.fa)-R        | attctgataattctcaggttcccacca    |
| <b>pBsG-full</b>     |                                |
| HT10-BsGfull-F       | gactaatggatccatgaataagggttggtt |
| HT10-BsGstop-R       | tttttctagatcacgcttcaccaatca    |
| <b>pBsGsubA</b>      |                                |
| BsGsubA-F            | atcgtgtccatattggatgtaaccgaacaa |
| BsGsubA-R            | gtcaaatctctcagctgaagcagatcatt  |
| <b>pBsGsubB</b>      |                                |
| BsGsubB-F            | aatgatctgcatatgctgtcgaaattgac  |
| BsGsubB-R            | cgttttatactcgagcgttcaccaat     |
| <b>Bsu (qRT-PCR)</b> |                                |
| rt_rm16S-2F          | cgtagaagctggaatcgctagt         |
| rt_rm16S-2R          | caaggcccgggaacgat              |
| rt_gyrA-F            | agtcattccagggcctgattt          |
| rt_gyrA-R            | attcgtatgctttccggatacc         |
| rt_rpoB-F            | gaccgggcccggattgaca            |
| rt_rpoB-R            | gccatagtgaggagtagtgaacgt       |
| rt_yvcE-F            | gaggacgcactcagtctga            |
| rt_yvcE-R            | tgccagcgtacgaatgat             |
| rt_yoeB-2F           | cgctagagaacattttggaacac        |
| rt_yoeB-2R           | tgatgggcaaactgcttttt           |
| rt_yjeA-F            | cattgccgcccagcat               |
| rt_yjeA-R            | caaagcggctgaaattttcttt         |
| <b>Sau (qRT-PCR)</b> |                                |
| rt-SArm16S-2F        | gtagatcagcatgctacggtgaa        |

|               |                              |
|---------------|------------------------------|
| rt-SArm16S-2R | tgtgacgggcggtgtga            |
| rt_gyrA(Sa)-F | ttaatgattgtfactaatgcaggtgtca |
| rt_gyrA(Sa)-R | cttgtgctgcacgaccattt         |
| rt_isaA-F     | ctggttcacagcagctcaaat        |
| rt_isaA-R     | gatgattgcagccatgtagaa        |
| rt_ssaA-F     | ggttacacagtgaacaatacaccaaaa  |
| rt_ssaA-R     | cgtgaccgtatgcaccttga         |

---
